# Supplementary material for: Halocarbon emissions by selected tropical seaweeds: species-specific and compound-specific responses under changing pH
Source: PeerJ. 2017 Jan 25;5:e2918. doi: 10.7717/peerj.2918 (PMC5270595; doi:10.7717/peerj.2918)
Supplement: Table S5 — Values before ±indicate percentage decrease in maximum quantum yield (Fv∕Fm) that are obtained by calculating the difference between Fv∕Fm values prior to and post incubation; followed by division of the Fv∕Fm prior to incubation and multiplication by 100; Values after the ‘±’ indicate standard deviation between replicates; n = 4 except T. conoides n = 5; a, b denote homogenous groups (p < 0.05) based on post-hoc Tukey test. [file peerj-05-2918-s005.docx]

| **pH value** | ***Kappaphycus alvarezii*** | ***Padina australis*** | ***Sargassum binderi*** | ***Sargassum siliquosum*** | ***Turbinaria conoides**** |
| --- | --- | --- | --- | --- | --- |
| **8.0** | 9.1 ± 3.4a | 3.2 ± 1.7a | 11.1 ± 1.1a | 6.4 ± 1.7a | 4.6 ± 1.9a |
| **7.8** | 9.5 ± 5.0a | 3.3 ± 1.0a | 9.7 ± 4.1a | 6.2 ± 2.7a | 13.5 ± 5.9b |
| **7.6** | 9.5 ± 7.5a | 5.0 ± 1.9a | 13.7 ± 7.3a | 9.9 ± 5.9a | 5.7 ± 3.8a |
| **7.4** | 16.6 ± 5.9a | 2.2 ± 1.6a | 13.7 ± 2.4a | 5.6 ± 4.2a | 5.9 ± 2.3a |
| **7.2** | 11.0 ± 3.6a | 3.6 ± 0.9a | 11.8 ± 6.0a | 8.9 ± 4.4a | 4.8 ± 3.6a |
