# Supplementary material for: Halocarbon emissions by selected tropical seaweeds: species-specific and compound-specific responses under changing pH
Source: PeerJ. 2017 Jan 25;5:e2918. doi: 10.7717/peerj.2918 (PMC5270595; doi:10.7717/peerj.2918)
Supplement: Table S7 — p ≤ 0.01 unless otherwise stated; # (p ≤ 0.04); n = 20; ** for T. conoides, n = 25; ∗ log values for CH3I emissions from P. australis were used prior to analysis; NS, non-significant. [file peerj-05-2918-s007.docx]

| **Halocarbon Compound** | ***Kappaphycus alvarezii*** | ***Padina australis*** | ***Sargassum binderi*** | ***Sargassum siliquosum*** | ***Turbinaria conoides***** |
| --- | --- | --- | --- | --- | --- |
| **CHBr3** | -0.24 NS | 0.07NS | 0.04NS | -0.16NS | -0.28 NS |
| **CH2Br2** | -0.08 NS | 0.26NS | 0.12 NS | -0.04NS | -0.33 NS |
| **CH3I** | -0.07 NS | 0.07 NS* | - | 0.14NS | -0.14 NS |
| **CH2I2** | - | -0.02NS | 0.20NS | -0.08NS | -0.23 NS |
| **CH2BrI** | -0.09 NS | 0.39 NS | 0.19NS | 0.08NS | -0.33 NS |
| **CH2BrCl** | -0.06 NS | 0.47# | 0.08 NS | 0.04NS | -0.35 NS |
| **CHBrCl2** | -0.11 NS | -0.19NS | -0.04NS | -0.06NS | -0.20 NS |
| **CHBr2Cl** | -0.14 NS | 0.22NS | 0.04NS | -0.10NS | -0.26 NS |
